# Supplementary material for: Non-Destructive Near-Infrared Technology for Efficient Cannabinoid Analysis in Cannabis Inflorescences
Source: MDPI journal article supplement (doi:10.3390/plants13060833), 2024-03-14
Supplement: s1 [file s1]

## Supplementary Materials

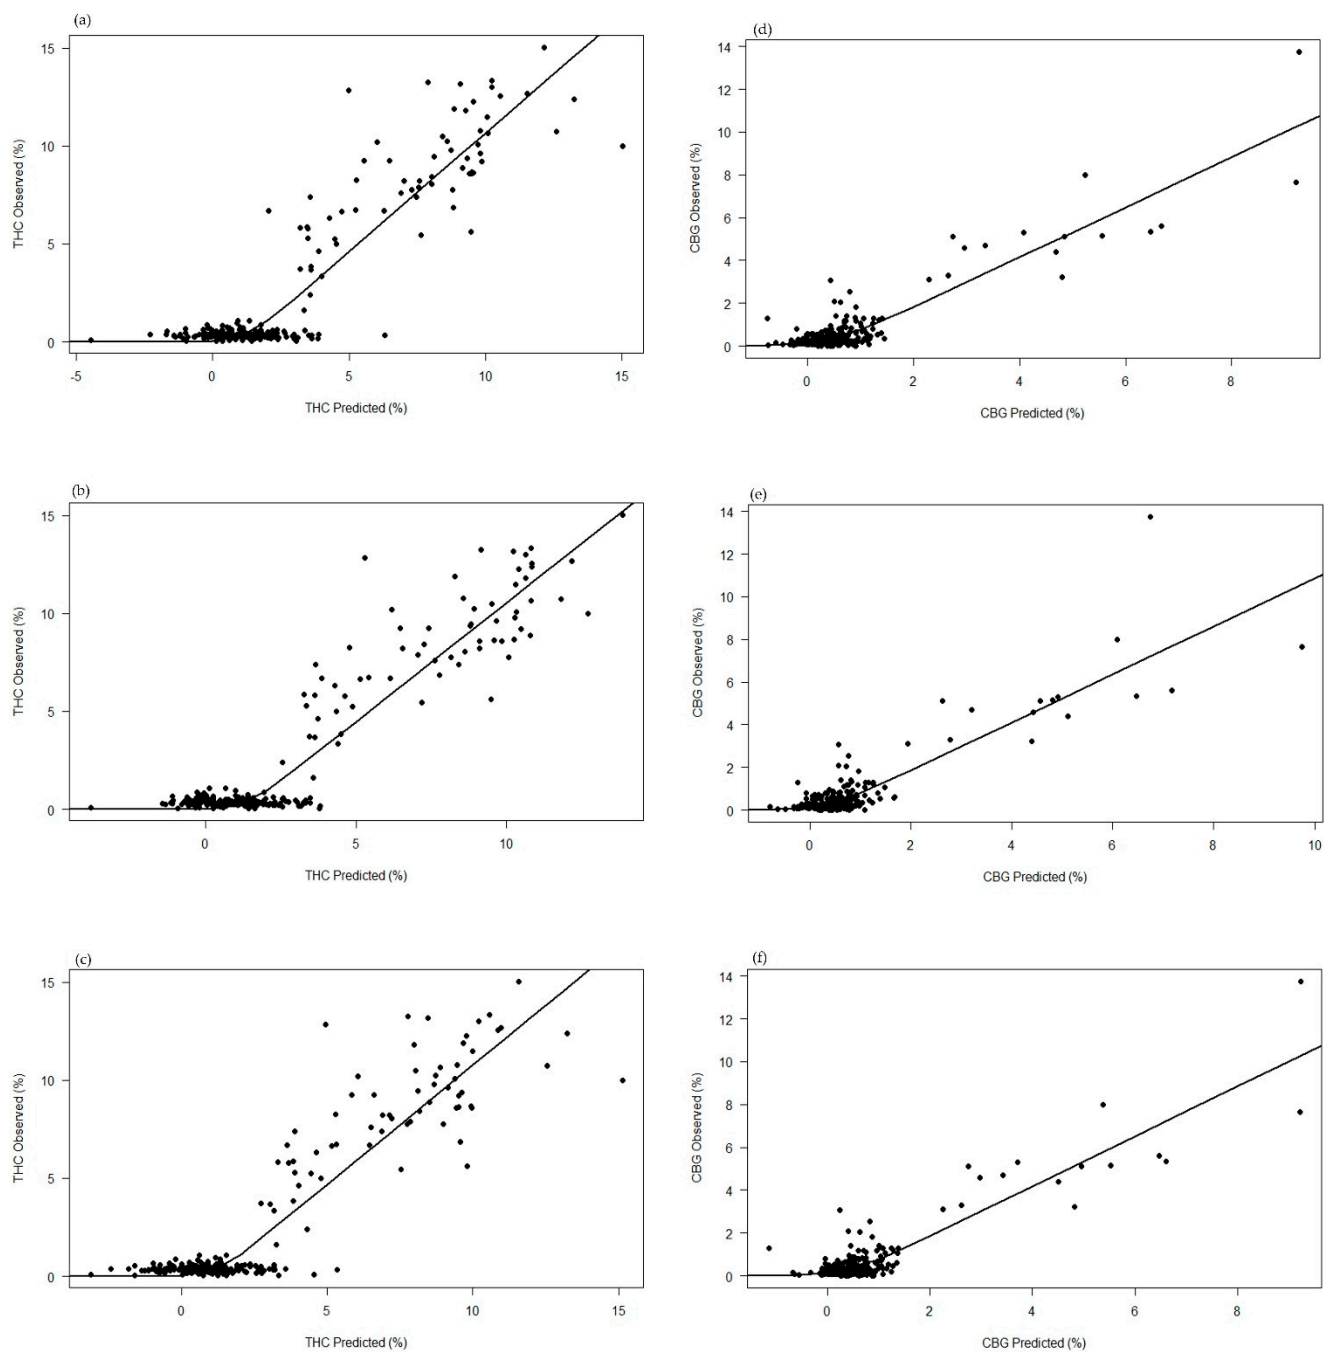

**Figure S1.** Observed versus predicted plot of the total delta-9-tetrahydrocannabinol (total THC) concentration for (a) raw data, (b) standard normal variate (SNV), and (c) Savitzky-Golay (SG) smoothing and total cannabigerol (total CBG) concentration for (d) raw data, (e) standard normal variate (SNV), and (f) Savitzky-Golay (SG) smoothing.
